# Supplementary material for: Hydrophobic Drug Carrier from Polycaprolactone-b-Poly(Ethylene Glycol) Star-Shaped Polymers Hydrogel Blend as Potential for Wound Healing Application
Source: MDPI journal article supplement (doi:10.3390/polym15092072), 2023-04-27
Supplement: s1 [file s1]

**Title:** HYDROPHOBIC DRUG CARRIER FROM POLYCAPROLACTONE-B-POLY(ETHYLENE GLYCOL) STAR-SHAPED POLYMERS HYDROGEL BLEND AS POTENTIAL FOR WOUND HEALING APPLICATION

**SUPPLEMENTARY MATERIAL**

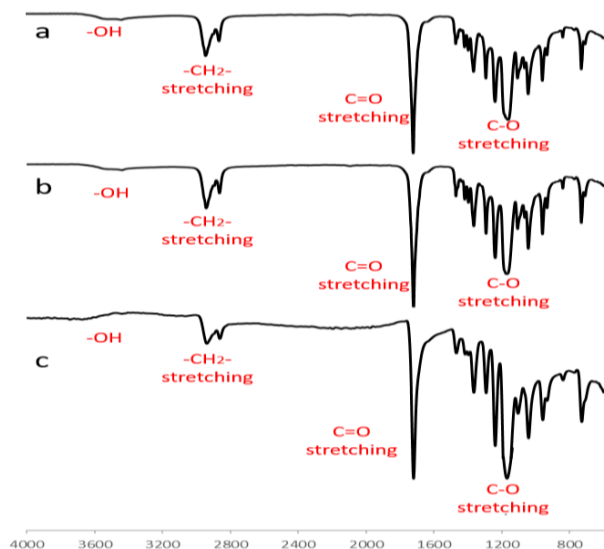

**Figure S1.** FTIR spectra of 4-arm (a) PCL<sub>5k</sub> (b) PCL<sub>10k</sub> and (c) PCL<sub>15k</sub>.

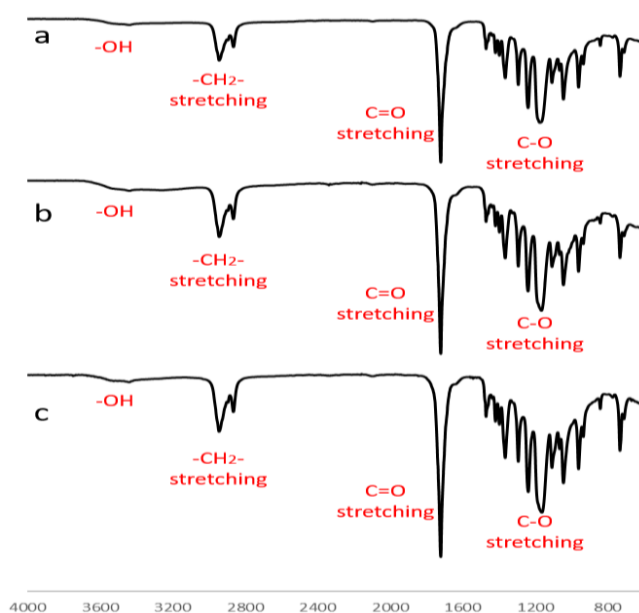

**Figure S2.** FTIR spectra of 6-arm (a) PCL<sub>5k</sub> (b) PCL<sub>10k</sub> and (c) PCL<sub>15k</sub>.

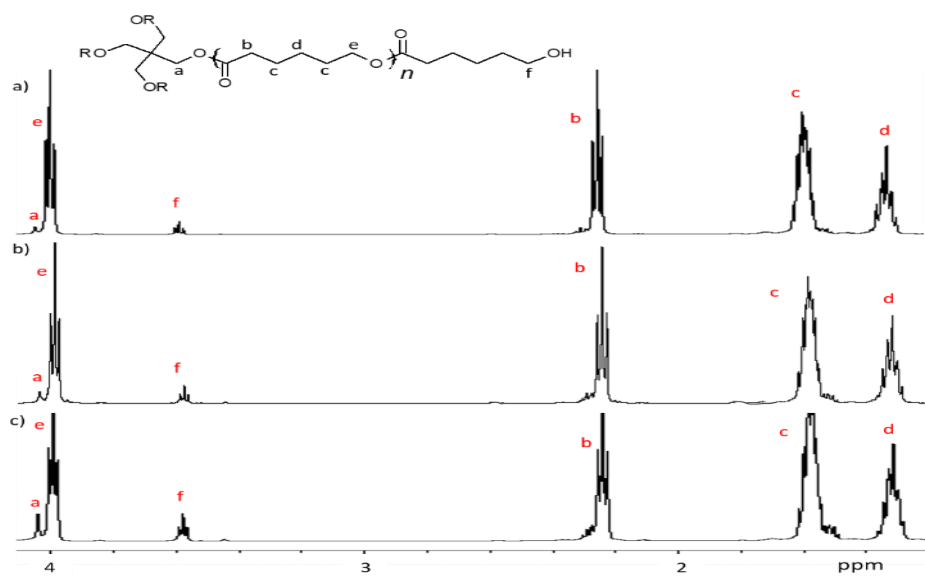

**Figure S3.**  $^1\text{H}$ -NMR spectra of 4-arm (a) PCL<sub>5k</sub> (b) PCL<sub>10k</sub> and (c) PCL<sub>15k</sub>.

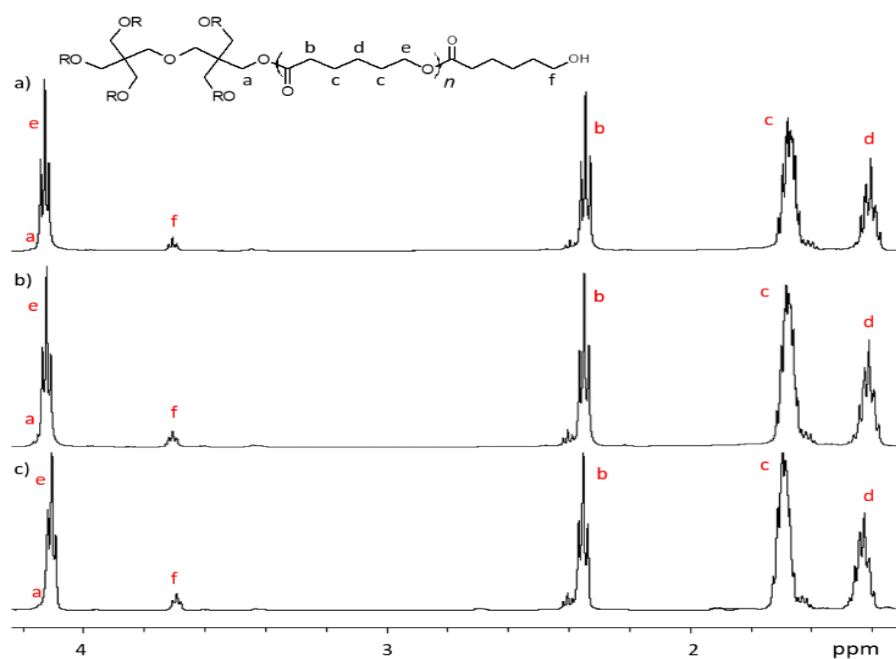

**Figure S4.**  $^1\text{H}$ -NMR spectra of 6-arm (a) PCL<sub>5k</sub> (b) PCL<sub>10k</sub> and (c) PCL<sub>15k</sub>.

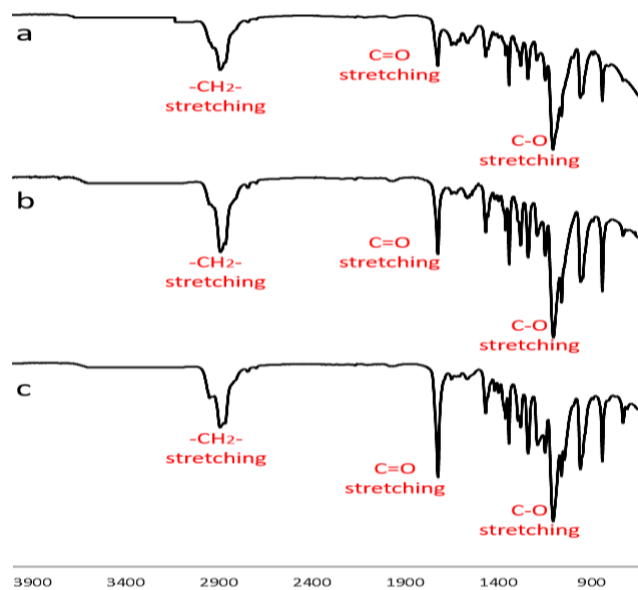

**Figure S5.** FTIR spectra of 4-arm (a) PCL<sub>5k</sub>-PEG, (b) PCL<sub>10k</sub>-PEG, and (c) PCL<sub>15k</sub>-PEG.

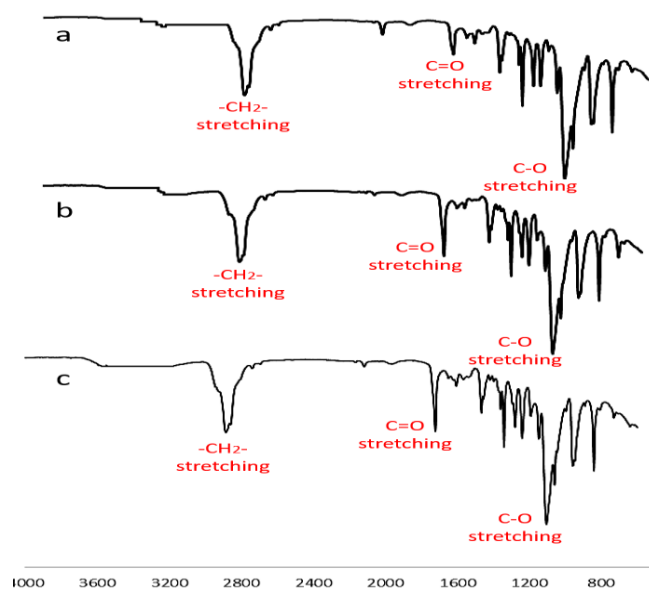

**Figure S6.** FTIR spectra of 6-arm (a) PCL<sub>5k</sub>-PEG, (b) PCL<sub>10k</sub>-PEG, and (c) PCL<sub>15k</sub>-PEG

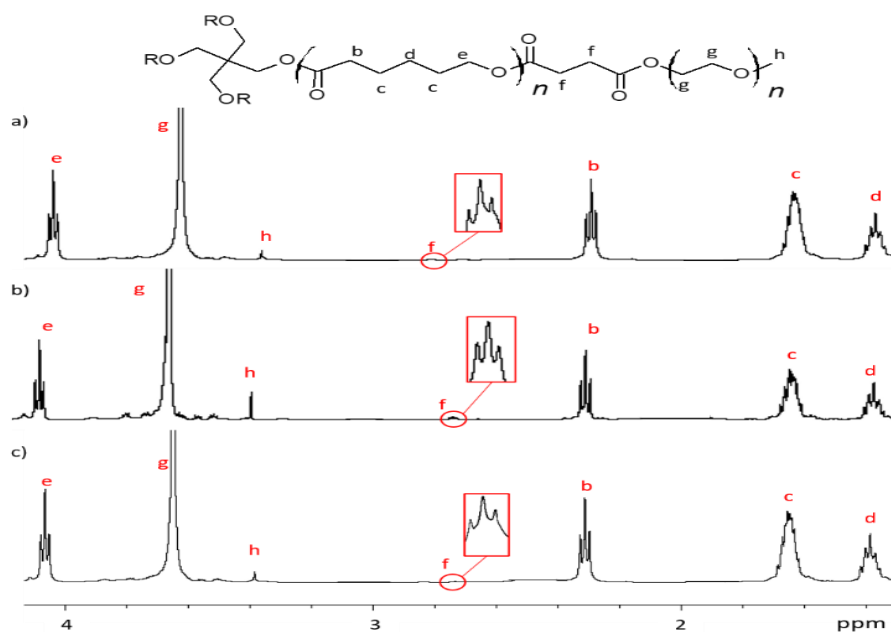

**Figure S7.**  $^1\text{H}$ -NMR spectra of 4-arm (a) PCL<sub>5k</sub>-PEG, (b) PCL<sub>10k</sub>-PEG, and (c) PCL<sub>15k</sub>-PEG.

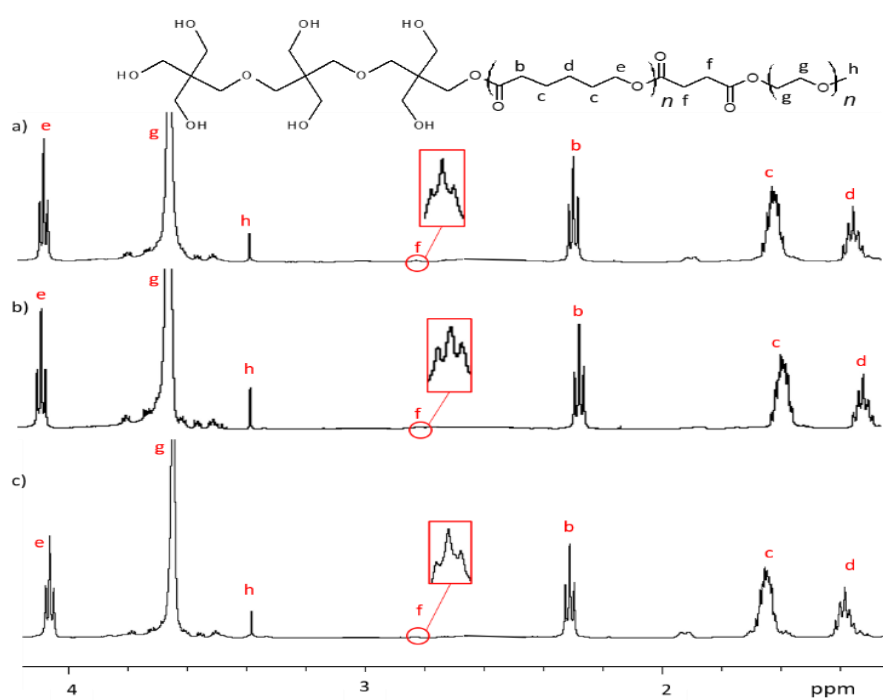

**Figure S8.**  $^1\text{H}$ -NMR spectra of 6-arm (a) PCL<sub>5k</sub>-PEG, (b) PCL<sub>10k</sub>-PEG, and (c) PCL<sub>15k</sub>-PEG.

**Table S1.** Cumulative release frequency (%) of the polymeric hydrogel formulations

| Formulation |   | Cumulative release % |                   |                   |                   |                   |                   |                   |
|-------------|---|----------------------|-------------------|-------------------|-------------------|-------------------|-------------------|-------------------|
|             |   | 1 hr                 | 2 hr              | 3 hr              | 4 hr              | 5hr               | 6 hr              | 7 hr              |
| F1          | A | 0.0110±<br>0.0044    | 0.0212±<br>0.0079 | 0.0310±<br>0.0112 | 0.0406±<br>0.0144 | 0.0498±<br>0.0178 | 0.0587±<br>0.0208 | 0.0674±<br>0.0238 |
|             | B | 0.0128±<br>0.0013    | 0.0252±<br>0.0027 | 0.0374±<br>0.0039 | 0.0492±<br>0.0052 | 0.0608±<br>0.0066 | 0.0722±<br>0.0080 | 0.0830±0<br>.0092 |
| F2          | A | 0.0149±0<br>.0013    | 0.0284±0<br>.0023 | 0.0415±0<br>.0033 | 0.0539±0<br>.0042 | 0.0661±0<br>.0050 | 0.0780±0<br>.0059 | 0.0896±0<br>.0066 |
|             | B | 0.0158±0<br>.0008    | 0.0307±0<br>.0016 | 0.0452±0<br>.0023 | 0.0590±0<br>.0029 | 0.0727±0<br>.0035 | 0.0861±0<br>.0043 | 0.0990±0<br>.0048 |
| F3          | A | 0.0162±0<br>.0017    | 0.0311±0<br>.0026 | 0.0459±0<br>.0039 | 0.0602±0<br>.0055 | 0.0748±0<br>.0071 | 0.0889±0<br>.0084 | 0.1019±0<br>.0100 |
|             | B | 0.0202±0<br>.0027    | 0.0394±0<br>.0051 | 0.0578±0<br>.0077 | 0.0759±0<br>.0100 | 0.0939±0<br>.0125 | 0.1116±0<br>.0147 | 0.1272±0<br>.0163 |
| F4          | A | 0.0127±0<br>.0007    | 0.0252±0<br>.0016 | 0.0372±0<br>.0024 | 0.0489±0<br>.0033 | 0.0603±0<br>.0042 | 0.0709±0<br>.0050 | 0.0811±0<br>.0057 |
|             | B | 0.0102±0<br>.0015    | 0.0198±0<br>.0030 | 0.0290±0<br>.0044 | 0.0378±0<br>.0059 | 0.0462±0<br>.0072 | 0.0542±0<br>.0085 | 0.0618±0<br>.0099 |
| F5          | A | 0.0143±0<br>.0034    | 0.0275±0<br>.0065 | 0.0401±0<br>.0096 | 0.0527±0<br>.0138 | 0.0628±0<br>.0141 | 0.0735±0<br>.0169 | 0.0837±0<br>.0199 |
|             | B | 0.0106±0<br>.0015    | 0.0210±0<br>.0030 | 0.0311±0<br>.0043 | 0.0408±0<br>.0057 | 0.0500±0<br>.0070 | 0.0590±0<br>.0083 | 0.0673±0<br>.0094 |
| F6          | A | 0.0150±0<br>.0009    | 0.0295±0<br>.0016 | 0.0434±0<br>.0023 | 0.0568±0<br>.0030 | 0.0697±0<br>.0037 | 0.0821±0<br>.0044 | 0.0938±0<br>.0051 |
|             | B | 0.0126±0<br>.0005    | 0.0243±0<br>.0011 | 0.0353±0<br>.0016 | 0.0460±0<br>.0021 | 0.0562±0<br>.0027 | 0.0657±0<br>.0031 | 0.0749±0<br>.0035 |

**Table S2.** Inhibition zone of all the formulations

| Formulations      |   | Microorganisms               |      |      |                         |      |      |
|-------------------|---|------------------------------|------|------|-------------------------|------|------|
|                   |   | <i>Staphylococcus aureus</i> |      |      | <i>Escherichia coli</i> |      |      |
|                   |   | Inhibition zone (mm)         |      |      | Inhibition zone (mm)    |      |      |
|                   |   | 1 h                          | 12 h | 24 h | 1 h                     | 12 h | 24 h |
| F3                | A | x                            | 9.3  | 19.0 | x                       | 10.0 | 20.0 |
|                   | B | x                            | 10.0 | 20.3 | x                       | 10.7 | 21.0 |
| F6                | A | x                            | 9.0  | 19.0 | x                       | 9.3  | 20.0 |
|                   | B | x                            | 8.7  | 18.3 | x                       | 7.3  | 19.0 |
| STD <sub>F3</sub> | A | x                            | x    | x    | x                       | x    | x    |
|                   | B | x                            | x    | x    | x                       | x    | x    |
| STD <sub>F6</sub> | A | x                            | x    | x    | x                       | x    | x    |
|                   | B | x                            | x    | x    | x                       | x    | x    |

F3 = Formulations with 4-arm PCL<sub>15k</sub>-PEG and Ciprofloxacin

F6 = Formulations with 6-arm PCL<sub>15k</sub>-PEG and Ciprofloxacin

STD<sub>F3</sub> = Formulations with 4-arm PCL<sub>15k</sub>-PEG

STD<sub>F6</sub> = Formulations with 6-arm PCL<sub>15k</sub>-PEG

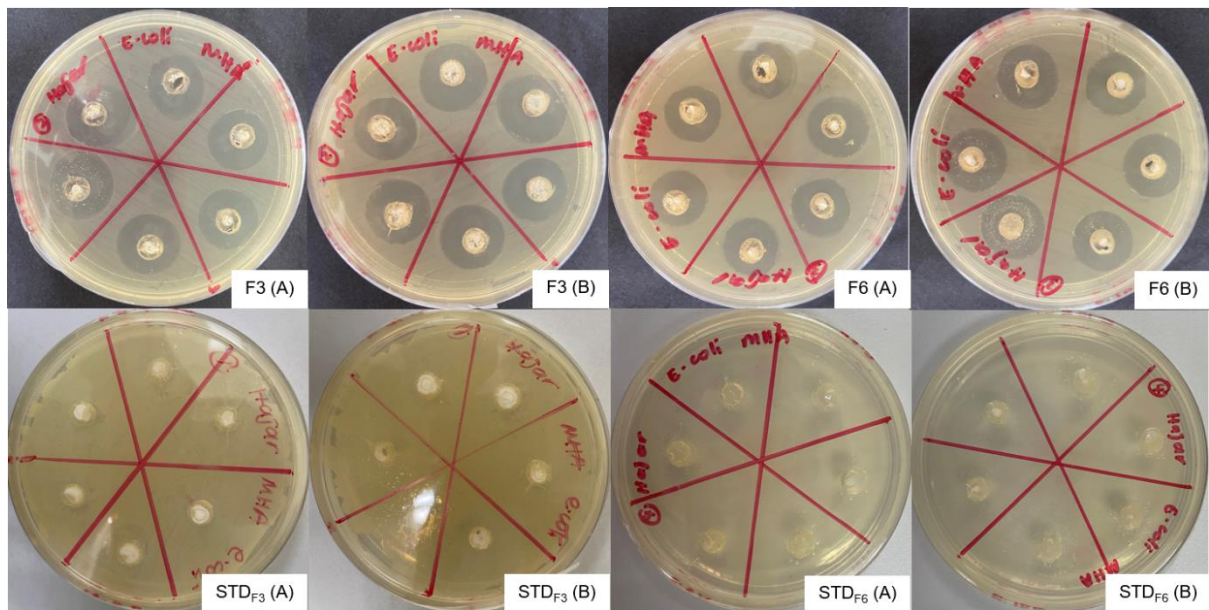

**Figure S9.** Inhibition zone for *Escherichia coli*

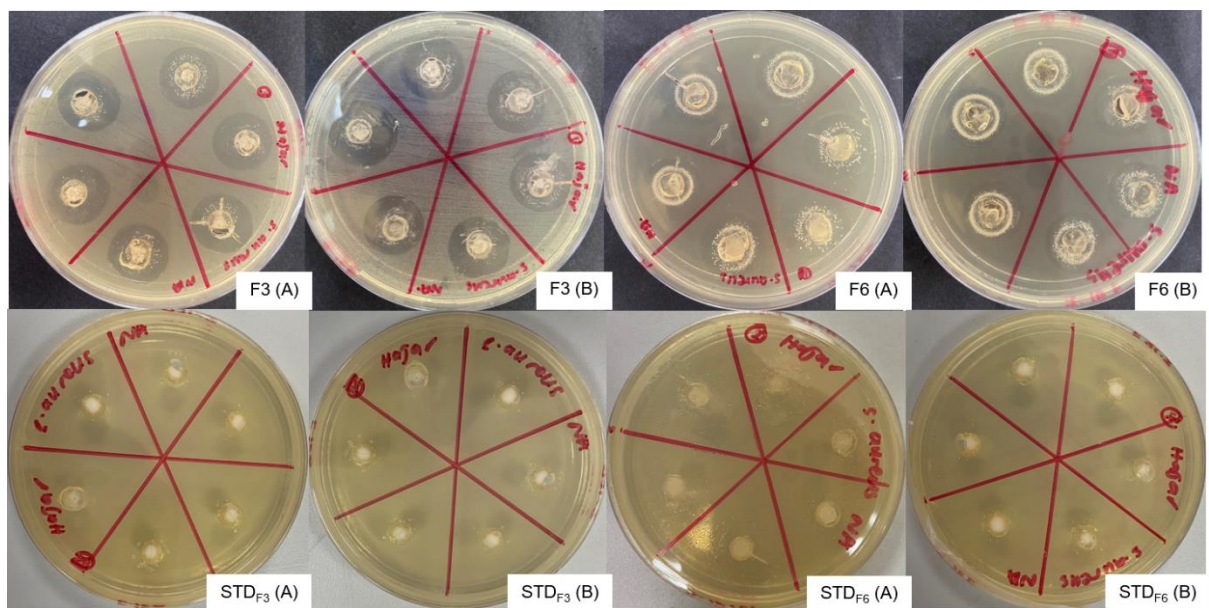

**Figure S10.** Inhibition zone for *Staphylococcus aureus*
